# Supplementary material for: A Maximum-Use Trial of Ruxolitinib Cream in Adolescents and Adults with Atopic Dermatitis
Source: PubMed Central journal article supplement — Am J Clin Dermatol. 2022 Apr 4;23(3):355–64. doi: 10.1007/s40257-022-00690-3 (PMC9142470; doi:10.1007/s40257-022-00690-3), 2022-04-04

## SUPPLEMENTARY MATERIAL

### A Maximum Use Trial of Ruxolitinib Cream in Adolescents and Adults With Atopic Dermatitis

Robert Bissonnette, MD, FRCPC,<sup>1</sup> Robert S. Call, MD,<sup>2</sup> Tooraj Raoof, MD,<sup>3</sup> Zhaoyin Zhu, PhD,<sup>4</sup> Swamy Yeleswaram, PhD,<sup>4</sup> Xiaohua Gong, PhD,<sup>4</sup> Mark Lee, MD<sup>5</sup>

<sup>1</sup>Innovaderm Research, Montreal, QC, Canada; <sup>2</sup>Clinical Research Partners, Richmond, VA, USA; <sup>3</sup>Encino Research Center, Encino, CA, USA; <sup>4</sup>Incyte Corporation, Wilmington, DE, USA; <sup>5</sup>Progressive Clinical Research, San Antonio, TX, USA

*American Journal of Clinical Dermatology*

Corresponding author: Robert Bissonnette, MD (rbissonnette@innovaderm.com)

## Contents

### Table of Contents

|                                                                                                                                                            |   |
|------------------------------------------------------------------------------------------------------------------------------------------------------------|---|
| Table S1. Platelet and Hemoglobin Levels in the 5 Patients With Highest C <sub>ss</sub> .....                                                              | 2 |
| Figure S1. Mean Plasma Concentrations on Day 1 and Day 28 in the (A and D) Overall Population and by (B and E) Baseline BSA and (C and F) Age Groups ..... | 3 |
| Figure S2. IGA Scores by Study Day .....                                                                                                                   | 4 |
| Figure S3. Change From Baseline in Daily Itch NRS Score .....                                                                                              | 5 |
| Figure S4. Proportion of Patients Achieving EASI-75 .....                                                                                                  | 6 |
| Figure S5. Representative Clinical Images .....                                                                                                            | 7 |

**Table S1. Platelet and Hemoglobin Levels in the 5 Patients With Highest C<sub>ss</sub>**

| Age,<br>y/Sex | BSA<br>Treated,<br>% | C <sub>ss</sub> , nM | Platelet Count on<br>Day 28, 10 <sup>9</sup> /L |                            | Hemoglobin on<br>Day 28, g/L |                            |
|---------------|----------------------|----------------------|-------------------------------------------------|----------------------------|------------------------------|----------------------------|
|               |                      |                      | Measured                                        | Change<br>From<br>Baseline | Measured                     | Change<br>From<br>Baseline |
| 45/M          | 25                   | 111                  | 307                                             | 9                          | 135                          | -4                         |
| 46/M          | 27                   | 122                  | 243                                             | 27                         | 180                          | -2                         |
| 13/M          | 43.4                 | 269                  | 345                                             | 81                         | 164                          | 10                         |
| 32/F          | 45                   | 711                  | 449                                             | 137                        | 130                          | -15                        |
| 60/M          | 90                   | 1870                 | 173                                             | -227                       | 136                          | -18                        |

BSA, body surface area; C<sub>ss</sub>, steady-state plasma concentration.

**Figure S1. Mean Plasma Concentrations on Day 1 and Day 28 in the (A and D) Overall Population and by (B and E) Baseline BSA and (C and F) Age Groups**

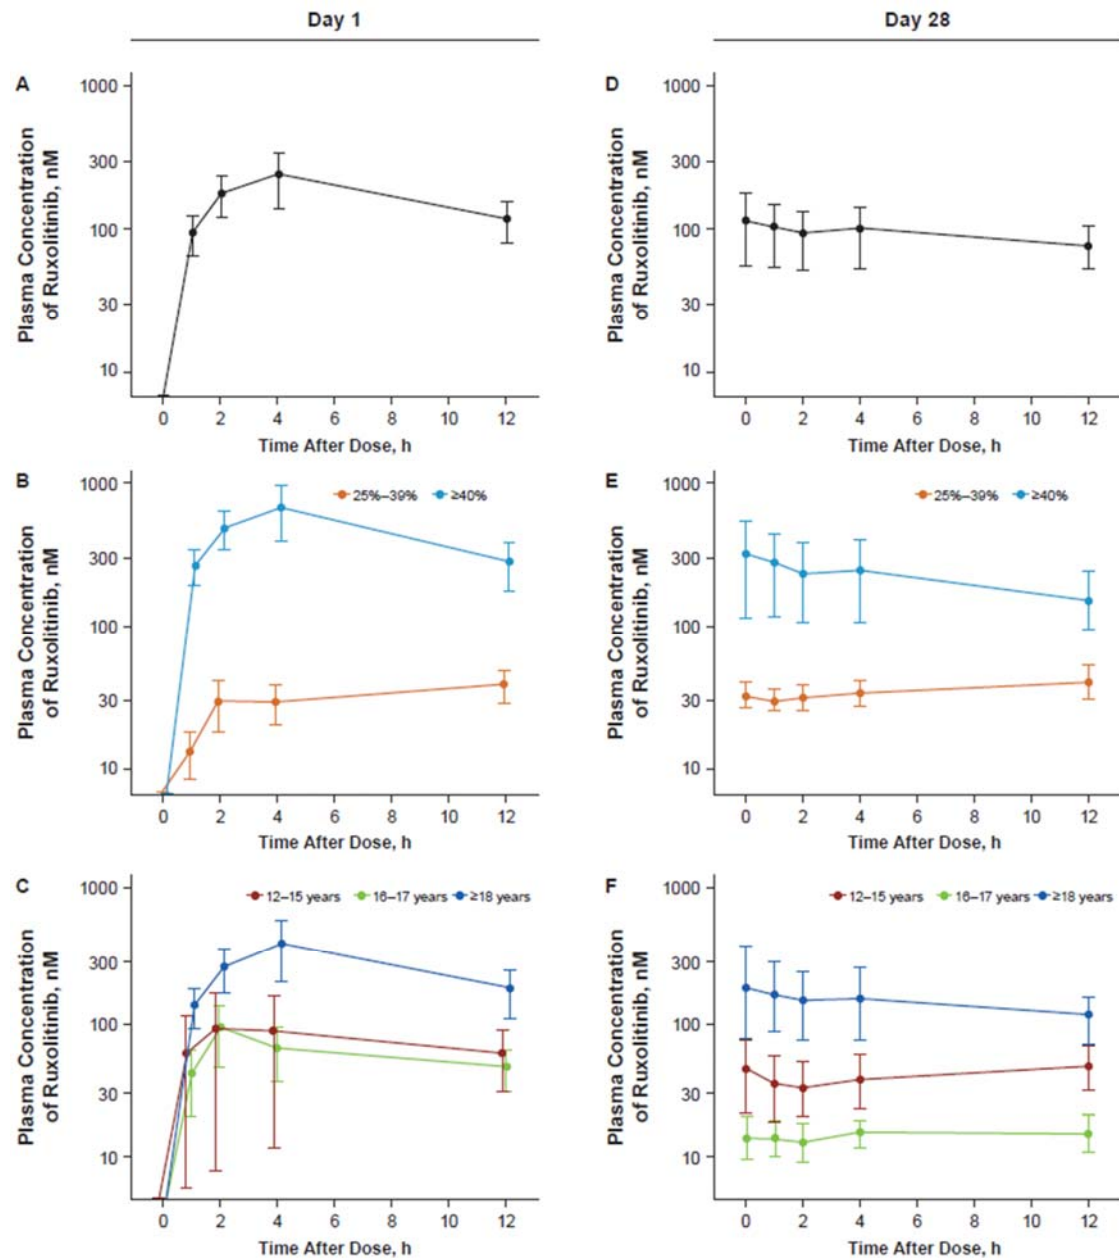

Data are shown as semilog plots.  
Error bars represent standard error of the mean.  
BSA, body surface area.

Figure S2. IGA Scores by Study Day

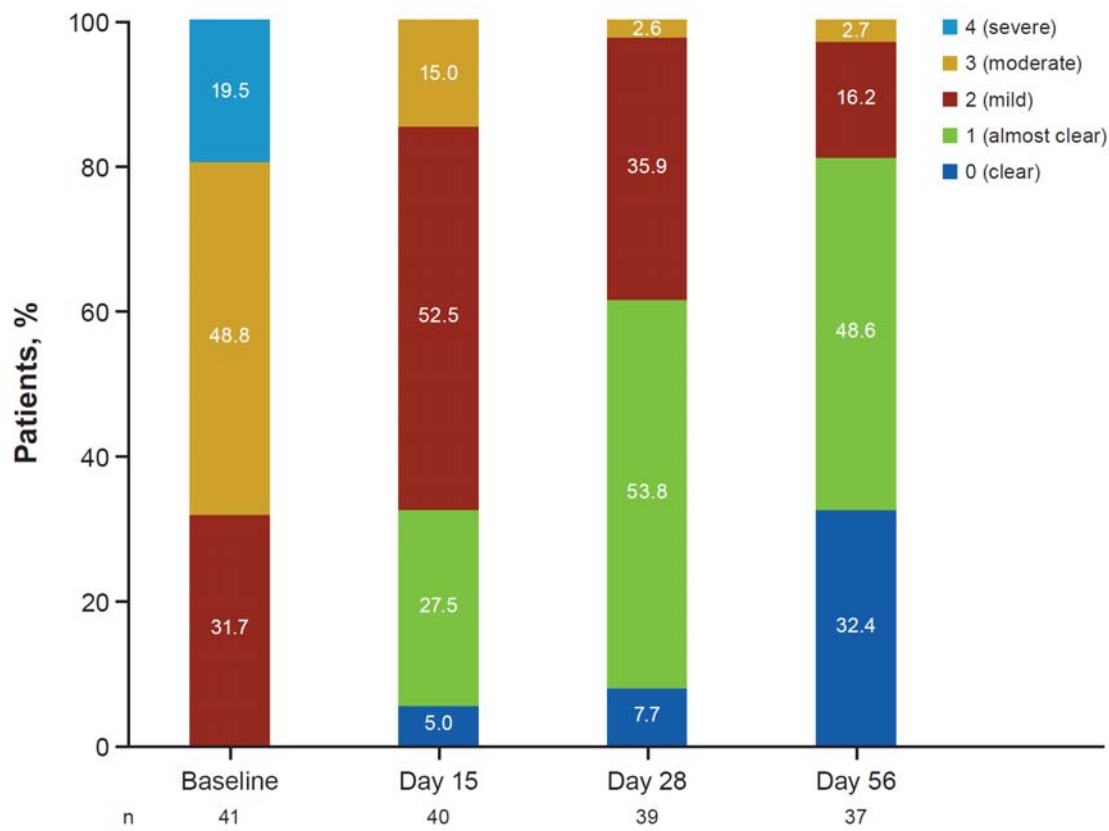

IGA, Investigator's Global Assessment.

Figure S3. Change From Baseline in Daily Itch NRS Score

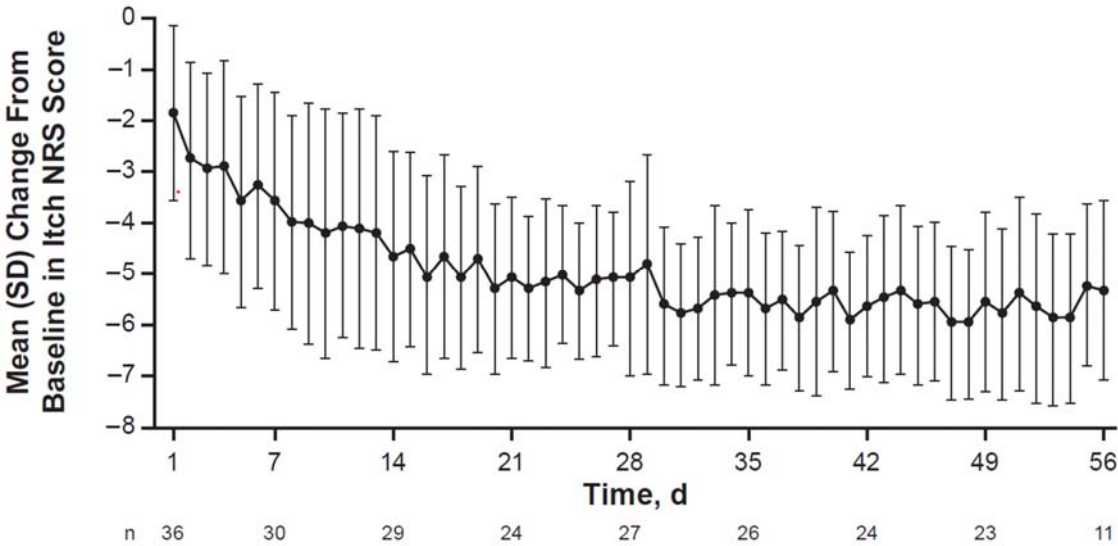

NRS, numerical rating scale.

**Figure S4. Proportion of Patients Achieving EASI-75**

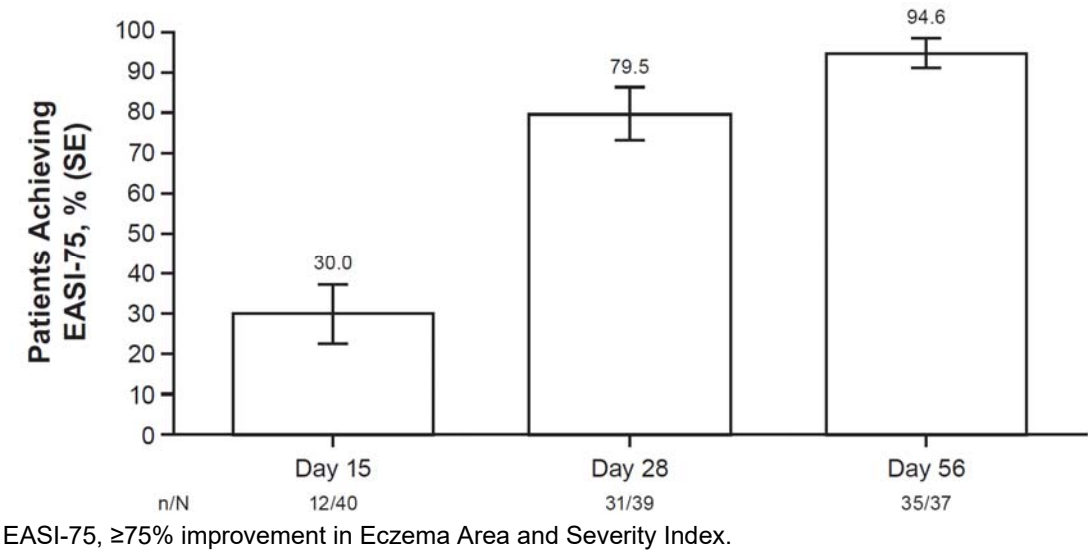

**Figure S5. Representative Clinical Images**

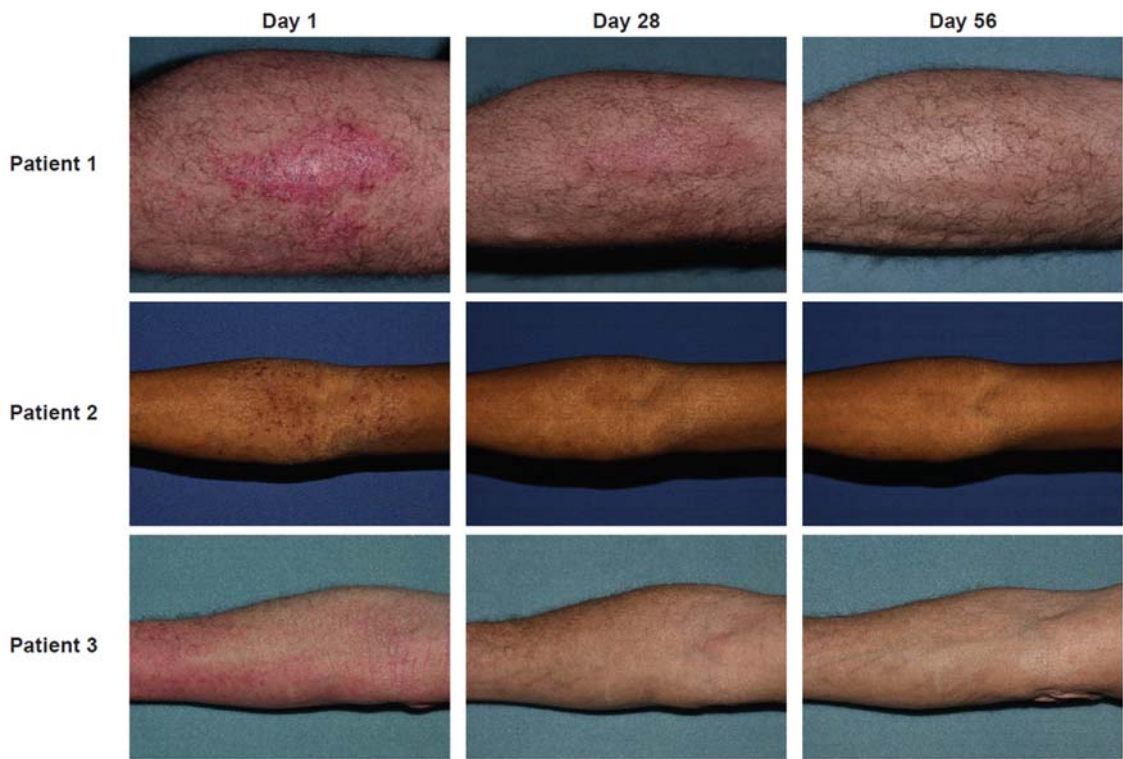

Supplement: 40257_2022_690_MOESM1_ESM.pdf [file 40257_2022_690_MOESM1_ESM.pdf]
